# Supplementary material
Source: publisher site journal article supplement (http://www.degruyter.com/publication/journal_key/INDO/downloadAsset/INDO_Instructions%20for%20Authors_English.pdf)
Supplement: Supplementary file 1 [file INDO_Instructions%20for%20Authors_English.pdf]

# Indogermanische Forschungen

Instructions for submission of manuscripts  
and information on the review process

[idgforsch@gwdg.de](mailto:idgforsch@gwdg.de)

## Contents

|          |                                                       |          |
|----------|-------------------------------------------------------|----------|
| <b>1</b> | <b>Submission</b>                                     | <b>1</b> |
| <b>2</b> | <b>Formatting of the manuscript</b>                   | <b>2</b> |
| <b>3</b> | <b>Levels of hierarchy (Sections and subsections)</b> | <b>3</b> |
| <b>4</b> | <b>Citations and bibliography</b>                     | <b>4</b> |
| <b>5</b> | <b>Review</b>                                         | <b>5</b> |

## 1 Submission

The submission of a manuscript for publication is normally done via the ScholarOne [submission platform](#). Please note the following details:

- Languages of publication: German, English, French, Italian, Spanish
- The essence of the content is to be captured in the form of 5–10 keywords.
- The text is to be preceded by an English summary of no more than 200 words.
- Allowable file platforms: .tex, .doc(x), .odt, .rtf.  $\text{\TeX}$  files are preferred.
- The file must be encoded in UTF-8.
- In addition to the original, a PDF must also be submitted.

## 2 Formatting of the manuscript

Since contributions will have to be freshly typeset for publication, no detailed formatting is necessary for submission. However, the following items must be observed when formatting the manuscript:

- All information about the authorship must be made **anonymous**.
- Line-spacing: At least 1.5 lines
- Data items that are the subject of linguistic discussion should be set in italics.
- Examples must be numbered. In case the examples are glossed, please follow the *Leipzig Glossing Rules*. Non-lexical information in the glosses should be set in SMALL CAPS.

Example:

(37) *unser-n*     *Väter-n*  
our-DAT.PL father.PL-DAT.PL  
‘to our fathers’ German

- Tables and charts must be numbered and given a caption, see Table 1.

Table 1: Possible sound correspondences of PIE vowels in Indo-Iranian

| PIE       | Indo-Iranian | Avestan  | Vedic    |
|-----------|--------------|----------|----------|
| <i>*o</i> | <i>*a</i>    | <i>a</i> | <i>a</i> |
| <i>*e</i> | <i>*a</i>    | <i>a</i> | <i>a</i> |

- Always put **footnote reference numbers** that have scope over a whole sentence **after** the period:  
“... the meaning of this position is well known.<sup>1</sup>”
- **Glosses** of words in main text in German articles are enclosed between the symbols ‚ (i. e. U+201A/UTF-8 E2809A) and ‘ (i. e. U=2018/UTF-8 E28098), e. g. ... lat. *domus* ‚Haus‘..., and in English articles between the symbols ‘ (i. e. U=2018/UTF-8 E28098) and ’ (i. e. U+2019/UTF-8 E28099), e. g. ... Lat. *domus* ‘house’ ...

---

<sup>1</sup>Cf. Wackernagel 1892.

- **Quotations**

- In German articles, quotations are enclosed between the symbols „ (i. e. U+201E/UTF-8 E2809E) and “ (i. e. U+201C/UTF-8 E2809C), e. g.  
... oder wie Wackernagel (1892: 434) es ausdrückt: „Ausnahmslose Herrschaft dieser Stellungsgewohnheiten kann man auch für frühere Zeit nicht behaupten.“
- In English articles, quotations are enclosed between the symbols “ (i. e. U+201C/UTF-8 E2809C) and ” (i. e. U+201D/UTF-8 E2809D), e. g.  
... to quote Wackernagel (1892: 343): “Ausnahmslose Herrschaft dieser Stellungsgewohnheiten kann man auch für frühere Zeit nicht behaupten.”
- In French articles, for both glosses and quotations the symbols « (i. e. U+00AB/UTF-8 C2AB) and » (i. e. U+00BB/UTF-8 C2BB) are used, e. g.  
... Lat. *domus* « maison » ...  
... comme le dit Wackernagel (1892: 434): « Ausnahmslose Herrschaft dieser Stellungsgewohnheiten kann man auch für frühere Zeit nicht behaupten. »
- **Transliterations** are to be set in the angled brackets ‹ (U+2329/UTF-8 E28CA9) and › (U+232A/UTF-8 E28CAA), e. g.:  
... Old Persian ‹v-s-n-a› ...
- For the empty set, the symbol ∅ (U+2205/E28885) (i. e. U+2205/E28885) is used, e. g.  
  
(1) *dic-∅*  
    sagen-IMP.2SG  
    ‘Sag!’
- Asterisks before reconstructed forms should not be in italics: \*-s.
- Underlining is to be avoided.

### 3 Levels of hierarchy (Sections and subsections)

*Indogermanische Forschungen* allows a maximum of three levels of hierarchy. Each section or subsection must have a label (i.e. a heading or subheading), as in this example:

#### 1 History of Linguistics

##### 1.1 Writing of grammars

###### 1.1.1 Ancient traditions

###### 1.1.2 Medieval traditions

The numbering of paragraphs alone instead of the use of such headings is to be avoided.

## 4 Citations and bibliography

Citations and bibliography are automatically generated from a database, so no exact adherence to a particular style is necessary. Nevertheless, the following items must be observed:

- All cited works, and only cited works, have to appear in the bibliography.
- Bibliographical information must be complete.
- Only provide information that appears in titles. Series titles, etc., are not to be included. Place of publication is kept in the original language: “... Roma: Istituto italiano per il medio ed estremo oriente ...”
- In reproducing titles of English-language works, capitals are used exclusively for titles of books, edited volumes, and journals, but not in the titles of articles.
- For citations in the text, the year and page number(s) are put in parentheses when it is the author that is being referred to: “... as Wackernagel (1892: 335–339) already intimated ...”
- When reference is made just to a work, no parentheses are used: “... it was already shown in Wackernagel 1892: 335–339 ...”
- For *ranges* the endash – (i. e. U+2013/UTF-8 E28093) is used, including page ranges, e. g. “... Wackernagel (1892: 335–339) showed ...”

A few examples:

### Monographs:

Hoffmann, Karl & Bernhard Forssman (2004). *Avestische Laut- und Flexionslehre*. 2nd ed. Innsbruck: Institut für Sprachen und Literaturen.

Example of a citation:

... it is known<sup>2</sup> that ...

### Multivolume works:

Kellens, Jean & Éric Pirart (1988–1991). *Les textes vieil-avestiques*. 3 vols. Wiesbaden: Reichert.

Example of a citation:

... As Kellens & Pirart (1988–1991: 2, 22) already note ...

---

<sup>2</sup>Hoffmann & Forssman 2004: 33–56.

### Articles in journals:

Wackernagel, Jacob (1892). “Über ein Gesetz der indogermanischen Wortstellung”. In: *Indogermanische Forschungen* 1, 333–436.

Example of a citation:

... cf. the arguments adduced in Wackernagel 1892.

### Articles in edited volumes:

Carruba, Onofrio (1986). “Die 3. Pers. Sing. des Possessivpronomens im Luwischen”. In: *Kanisuwar*. A tribute to Hans G. Güterbock on his seventy-fifth birthday, May 27, 1983. Ed. by Harry A. Hoffner Jr. & Gary M. Beckman. Chicago: Oriental Institute of the University of Chicago, 49–52.

Example of a citation:

..., which I will not discuss further (cf. Carruba 1986: 50; Hoffmann & Forssman 2004: 234; Klingenschmitt 1994).

### Articles in conference proceedings:

Barðdal, Jóhanna & Thórhallur Eythórsson (2009). “The origin of the oblique-subject construction. An Indo-European comparison”. In: *Grammatical Change in Indo-European Languages*. Papers presented at the workshop on Indo-European linguistics at the XVIIIth International Conference on Historical Linguistics, Montreal, 2007. Ed. by Vít Bubeník, John Hewson & Sarah Rose. Amsterdam & Philadelphia: John Benjamins, 179–194.

Klingenschmitt, Gert (1994). “Das Tocharische in indogermanistischer Sicht”. In: *Tocharisch*. Akten der Arbeitstagung der Indogermanischen Gesellschaft (Berlin, September 1990). Ed. by Bernfried Schlerath. Reykjavík: Málvísindastofnun Háskóla Íslands, 310–411.

Example of a citation:

... Since Klingenschmitt’s explanation (1994: 400f.) ...

### Online publications:

Gippert, Jost (1997ff.). *Corpus of Pahlavi Texts*. On the basis of the edition by Jamaspji Dastur Minocherji Jamasp-Asana, Pahlavi Texts, [reedited with] Transcription [and] Translation [by] Said Orian, Tehran 1992. URL: <http://titus.uni-frankfurt.de/texte/etcs/iran/miran/mpers/jamasp/jamas.htm>.

Example of a citation:

... (text following Gippert 1997ff. [last accessed 01.01.2016]).

## 5 Review

*Indogermanische Forschungen* utilize a peer review process that is structured as follows:

- The content and form of all submitted articles are first reviewed by the editors together with the advisory board. This review in some cases results in a recommendation to revise and resubmit.
- If the editors and advisory board agree that the article may be acceptable for publication in IF, it is sent to a specialist for peer review.
- The review is drawn up anonymously, i. e., only the editors know the identity of the reviewer. The review process is double-blind, i. e., the submitted articles need to be anonymized.
- Based on the reviewers' evaluations, the editors make a decision and communicate it to the author(s). In case revisions are necessary, all the evaluators' suggestions and queries must be taken into consideration and the author must document his or her reactions to them.

The advisory board consists of the following members at the present time:

- Daniel Petit (École normale supérieure, Paris)
- Stefan Schumacher (Universität Wien)
- Guðrún Þórhallsdóttir (Málvísindastofnun Háskóla Íslands, Reykjavík)
- Michael Weiss (Cornell University, Ithaca)
